# Supplementary material for: Carrot AOX2a Transcript Profile Responds to Growth and Chilling Exposure
Source: MDPI journal article supplement (doi:10.3390/plants10112369), 2021-11-03
Supplement: s1 [file s1]

**Table S3** – Category wise list of *cis*-elements extracted from 2 Kbp upstream region of *DcAOX2a* using PlantCare and PLACE.

| Categories based on functions | Extracted <i>Cis</i> -element (Tools used) |             | Sequence                   | Specific functions of <i>cis</i> -elements                                                                                                                                         |
|-------------------------------|--------------------------------------------|-------------|----------------------------|------------------------------------------------------------------------------------------------------------------------------------------------------------------------------------|
|                               | NewPlace                                   | PlantCARE   |                            |                                                                                                                                                                                    |
| <b>Cellular Functions</b>     | AACACOREOSGLUB1                            | -           | AACAAAC                    | Endosperm-specific gene expression                                                                                                                                                 |
|                               | ACGTOSGLUB1                                | -           | GTACGTG                    | Endosperm-specific gene expression                                                                                                                                                 |
|                               | AGATCONSENSUS                              | -           | TTWCCWWWNNGGWW             | Flower-specific gene expression                                                                                                                                                    |
|                               | BOXINTPATPB                                | -           | ATAGAA                     | Organelle specific (plastid) gene expression                                                                                                                                       |
|                               | CAATBOX1                                   | -           | CAAT                       | Tissue specific gene expression                                                                                                                                                    |
|                               | CACTFTPPCA1                                | -           | YACT                       | Mesophyll-specific gene expression                                                                                                                                                 |
|                               | CANBNNAPA                                  | -           | CNAACAC                    | Embryo and endosperm-specific transcription                                                                                                                                        |
|                               | CARGATCONSENSUS                            | -           | CCWWWWWG                   | Flowering regulation and vernalisation                                                                                                                                             |
|                               | CCAATBOX1                                  | -           | CCAAT                      | Flowering regulation                                                                                                                                                               |
|                               | -                                          | CCGTCC-box  | CCGTCC                     | Growth and development responsive element                                                                                                                                          |
|                               | CEREGLUBOX3PSLEGA                          | -           | TGTAAGT                    | Tissue specific promoter                                                                                                                                                           |
|                               | CIACADIANLELHC                             | circadian   | CAANNNNATC                 | Circadian control                                                                                                                                                                  |
|                               | -                                          | dOCT        | CaCGGATC                   | Proliferation-coupled and S phase-specific, which confers tissue-specific expression, such as in newly developing meristems                                                        |
|                               | DOFCOREZM                                  | -           | AAAG                       | Sperm-specific expression during gametophyte development                                                                                                                           |
|                               | DRE1COREZMRAB17                            | -           | ACCGAGA                    | Late embryogenesis; ABA and drought responsive                                                                                                                                     |
|                               | -                                          | GCN4_motif  | TGAGTCA                    | Endosperm specific gene expression                                                                                                                                                 |
|                               | -                                          | HD-Zip 2    | CAATCATTG                  | Control of leaf morphology development                                                                                                                                             |
|                               | L1BOXATPDF1                                | -           | TAAATGYA                   | Shoot epidermal cell differentiation, plant trichome development, L1 layer-specific gene expression                                                                                |
|                               | MYBCOREATCYCB1                             | -           | AACGG                      | Cell cycle phase-independent activation; gene expression induction in actively dividing cells                                                                                      |
|                               | NODCON1GM                                  | -           | AAAGAT                     | Nodule specific                                                                                                                                                                    |
|                               | NODCON2GM                                  | -           | CTCTT                      | Nodule specific                                                                                                                                                                    |
|                               | NTBBF1ARROLB                               | -           | ACTTTA                     | Tissue-specific expression and auxin induction                                                                                                                                     |
|                               | POLLEN1LELAT52                             | -           | AGAAA                      | Anther and pollen development                                                                                                                                                      |
|                               | PRECONSCRHSP70A                            | -           | SCGAYNRNNNNNNNNNNNNNNNNHHD | Plastid response element                                                                                                                                                           |
|                               | RHERPATEXPA7                               | -           | KCACGW                     | Root hair-specific cis-elements                                                                                                                                                    |
|                               | ROOTMOTIFTAPOX1                            | -           | ATATT                      | Organ-specific                                                                                                                                                                     |
|                               | SITEIIATCYTC                               | -           | TGGGCY                     | Organ/Tissue-specific                                                                                                                                                              |
|                               | -                                          | Skn-1_motif | GTCAT                      | Endosperm expression                                                                                                                                                               |
|                               | S1FBOXSORPS1L21                            | -           | ATGGTA                     | Plastid-related                                                                                                                                                                    |
|                               | TAAAGSTKST1                                | -           | TAAAG                      | Guard cell-specific gene expression                                                                                                                                                |
|                               | TATCCAOSAMY                                | -           | TATCCA                     | Sugar and hormone regulation                                                                                                                                                       |
|                               | TGTCACACMCUCUMISIN                         | -           | TGTCACA                    | Fruit-specific expression                                                                                                                                                          |
|                               | WUSATAg                                    | -           | TTAATGG                    | Regulation of stem cell population maintenance in shoots and floral meristems; regulation of genes expressed in the central cells of quiescent centers in the root apical meristem |

|                        |                  |             |              |                                                                                                                                                                   |
|------------------------|------------------|-------------|--------------|-------------------------------------------------------------------------------------------------------------------------------------------------------------------|
| <b>Stress Response</b> | ABRELATERD1      | -           | ACGTG        | Dehydration stress and dark-induced senescence                                                                                                                    |
|                        | ACGTATERD1       | -           | ACGT         | Dehydration stress and dark-induced senescence                                                                                                                    |
|                        | AGCBOXNPGLB      | -           | AGCCGCC      | Ethylene-Induced transcription of defense genes                                                                                                                   |
|                        | ANAERO1CONSENSUS | -           | AAACAAA      | Anaerobically induced                                                                                                                                             |
|                        | ANAERO2CONSENSUS | -           | AGCAGC       | Anaerobically induced                                                                                                                                             |
|                        | -                | ARE         | TGGTTT       | Anaerobically induced                                                                                                                                             |
|                        | ASF1MOTIFCAMV    | TGACG-motif | TGACG        | Biotic and abiotic (e.g. light) stress stimulated; xenobiotic-stress-activated of genes preferentially expressed in root tip meristems; auxin and MeJA responsive |
|                        | -                | ATCT-motif  | AATCTGATCG   | Light-responsive                                                                                                                                                  |
|                        | BIHD1OS          | -           | TGTCA        | Disease resistance responses                                                                                                                                      |
|                        | BOXIIPCCHS       | -           | ACGTGGC      | Light regulation and ABA responsive                                                                                                                               |
|                        | -                | Box 1       | TTTCAAA      | Light responsive                                                                                                                                                  |
|                        | -                | Box 4       | ATTAAT       | Light responsive                                                                                                                                                  |
|                        | CACGTGMOTIF      | -           | CACGTG       | Defence-related, ABA induced and gene regulation during somatic embryogenesis                                                                                     |
|                        | -                | CATT-motif  | GCATTC       | Light-responsive                                                                                                                                                  |
|                        | CGACGOSAMY3      | -           | CGACG        | Sugar responsiveness coupled to environmental stress regulation                                                                                                   |
|                        | CGCGBBOXAT       | -           | VCGCGB       | Involved in ethylene, abscisic acid and light perception, known as Ca <sup>2+</sup> /calmodulin regulatory element                                                |
|                        | -                | chs-CMA1a   | TTACTTAA     | Light responsive                                                                                                                                                  |
|                        | CURECORECR       | -           | GTAC         | Copper and oxygen-responsive                                                                                                                                      |
|                        | EBOXBNNAPA       | -           | CANNTG       | Defense-related gene                                                                                                                                              |
|                        | ELRECOREPCRP1    | Box-W1      | TTGACC       | Pathogen- and wound-induced signaling                                                                                                                             |
|                        | -                | GA-motif    | AARGAWGA     | Light responsive                                                                                                                                                  |
|                        | GATABOX          | -           | GATA         | Light responsive, and tissue specific expression                                                                                                                  |
|                        | -                | G-Box       | CACGWN       | Light responsive                                                                                                                                                  |
|                        |                  |             | TAAACGTG     |                                                                                                                                                                   |
|                        |                  |             | CACGTGG      |                                                                                                                                                                   |
|                        | GCCCORE          | -           | GCCGCC       | Pathogen responsive, ethylene and jasmonate-responsive                                                                                                            |
|                        | -                | GC-motif    | CCCCCG       | Anoxic specific inducibility                                                                                                                                      |
|                        | GT1CONSENSUS     | -           | GRWAAW       | Light responsive                                                                                                                                                  |
|                        | GT1CORE          | GT1-motif   | GGTTAA       | Light responsive                                                                                                                                                  |
|                        | GT1MOTIFPSRBCS   | -           | KWGTGRWAAWRW | Light responsive                                                                                                                                                  |
|                        | GT1GMSCAM4       | -           | GAAAAA       | Pathogen- and salt induced                                                                                                                                        |
|                        | -                | HSE         | AAAAATTYS    | Heat stress response                                                                                                                                              |
|                        | IBOXCORE         | -           | GATAA        | Light responsive                                                                                                                                                  |
|                        | INRNTPSADB       | -           | YTCANTYY     | Light responsive                                                                                                                                                  |
|                        | IRO2OS           | -           | CACGTGG      | Iron regulated                                                                                                                                                    |
|                        | MYBCORE          | -           | CNGTTR       | Water stress (drought tolerance)                                                                                                                                  |
|                        | MYB1AT           | -           | WAACCA       | Dehydration responsive                                                                                                                                            |
|                        | MYB2CONSENSUSAT  | -           | YAACKG       | Dehydration responsive in abscisic acid signaling                                                                                                                 |
|                        | MYCCONSUSAT      | -           | CANNTG       | Cold responsive (freezing tolerance)                                                                                                                              |
|                        | OSE1ROOTNODULE   | -           | AAAGAT       | Mycorrhiza and nodulation-response                                                                                                                                |

|                            |                                                                                                                                                                                                                                                                                   |                                                                                                          |                                                                                                                                                                                                                                   |                                                                                                                                                                                                                                                                                                                                                                                                                                                                                                                                                                                                                                   |
|----------------------------|-----------------------------------------------------------------------------------------------------------------------------------------------------------------------------------------------------------------------------------------------------------------------------------|----------------------------------------------------------------------------------------------------------|-----------------------------------------------------------------------------------------------------------------------------------------------------------------------------------------------------------------------------------|-----------------------------------------------------------------------------------------------------------------------------------------------------------------------------------------------------------------------------------------------------------------------------------------------------------------------------------------------------------------------------------------------------------------------------------------------------------------------------------------------------------------------------------------------------------------------------------------------------------------------------------|
|                            | PALBOXAPC<br>PREATPRODH<br>QARBNEXTA<br>REALPHALGLHCB21<br>SEBFCONSSTPR10A<br>SORLIP1AT<br>SORLIP2AT<br>SURECOREATSULTR11<br>-<br>SREATMSD<br><br>TATABOX5<br>TBOXATGAPB<br>-<br>-<br>WBOXNTERF3<br>-10PEHVPSBD                                                                   | -<br>-<br>-<br>-<br>-<br>-<br>-<br>Sp1<br>-<br><br>-<br>-<br>TC-rich repeats<br>TCT-motif<br>-<br>-<br>- | CCGTCC<br>ACTCAT<br>AACGTGT<br>AACCAA<br>YTGTCWC<br>GCCAC<br>GGGCC<br>GAGAC<br>CC(G/A)CCC<br>TTATCC<br><br>TTATTT<br>ACTTTG<br>ATTTTCTTCA<br>TCTTAC<br>TGACY<br>TATTCT                                                            | Elicitor or light responsiveness<br>Proline and hypoosmolarity responsive<br>Wounding and tensile stress<br>Light responsive (required for phytochrome regulation)<br>Pathogenesis related<br>Light responsive on root -specific genes<br>Light responsive (phytochrome A-regulated)<br>Sulfur responsive<br>Light responsive<br>Sugar repressive element (SRE) identified in genes coupled to abiotic stresses and plant hormone-responsive<br>Light responsive<br>Light responsive<br>Defense and stress responsive<br>Light responsive<br>Wounding induced<br>Light responsive                                                 |
| <b>Hormonal Regulation</b> | ABRERATCAL<br>ACGTABREMOTIFA2OSE<br>M<br><br>ARFAT<br>ARR1AT<br>CPBCSPOR<br>DPBFCOREDCDC3<br>-<br>ERELEE4<br>GAREAT<br>-<br>GARE1OSREP1<br>MYBGAHV<br>PROXBBNNAPA<br>PYRIMIDINEBOXHVEPB1<br>PYRIMIDINEBOXOSRAM<br>Y1A<br>RYREPEATBNNAPA<br>T/GBOXATPIN2<br>WBOXATNPR1<br>WRKY71OS | -<br>ABRE<br><br>-<br>-<br>-<br>ERE<br>-<br><br>GARE-motif<br>-                                          | MACGYGB<br>ACGTGKC<br>CACTGT<br>TACGTG<br>TGTCTC<br><br>NGATT<br>TATTAG<br>ACACNNG<br>ATTTCAAA<br>AWTTCAAA<br>TAACAAR<br>AAACAGA<br>TAACAGA<br>TAACAAA<br>CAAACACC<br>TTTTTTCC<br>CCTTTT<br><br>CATGCA<br>AACGTG<br>TTGAC<br>TGAC | ABRE-related sequence as Ca <sup>2+</sup> -responsive<br>Absciscic Acid (ABA) response and dehydration responsive (DRE)<br><br>Auxin-responsive<br>Cytokinin-regulated<br>Cytokinin-regulated<br>ABA-responsive and embryo-specification elements<br>Ethylene-responsive<br>Ethylene responsive<br>GA-responsive<br>GA-responsive<br>GA-responsive<br>GA-responsive<br>ABA-responsive<br>GA and abscisic acid responsive<br>Induced in the aleurone layers in response to GA<br><br>ABA-responsive<br>Jasmonate-signaling<br>SA-induced pathogenesis-defence<br>GA signaling pathway; ABA signalling;<br>plant defence signalling |
