# Supplementary material for: Carrot AOX2a Transcript Profile Responds to Growth and Chilling Exposure
Source: MDPI journal article supplement (doi:10.3390/plants10112369), 2021-11-03
Supplement: s1 [file s1]

**Table S1.** Carrot root fresh weight and length at each time point

| Time | 203-1                      |                         | 207-1                     |                         | 'Rotin'                   |                         | 699-1                    |                         | 711-1                      |                         |
|------|----------------------------|-------------------------|---------------------------|-------------------------|---------------------------|-------------------------|--------------------------|-------------------------|----------------------------|-------------------------|
|      | Weight                     | Length                  | Weight                    | Length                  | Weight                    | Length                  | Weight                   | Length                  | Weight                     | Length                  |
|      | Average (g) ± SD           | Average (cm) ± SD       | Average (g) ± SD          | Average (cm) ± SD       | Average (g) ± SD          | Average (cm) ± SD       | Average (g) ± SD         | Average (cm) ± SD       | Average (g) ± SD           | Average (cm) ± SD       |
| 5W   | 0.15 <sup>c,d</sup> ± 0.07 | 8.3 <sup>b</sup> ± 2.2  | 0.16 <sup>c,d</sup> ± 0.1 | 5.6 <sup>b</sup> ± 2.9  | 0.1 <sup>c,d</sup> ± 0.03 | 6 <sup>b</sup> ± 0.8    | 0.16 <sup>b</sup> ± 0.09 | 6.9 <sup>b</sup> ± 1.8  | 0.17 <sup>b</sup> ± 0.1    | 7.9 <sup>b</sup> ± 1.3  |
| 7W   | 3.4 <sup>b,c</sup> ± 1.5   | 14.6 <sup>a</sup> ± 1.9 | 5.7 <sup>b,c</sup> ± 3.6  | 18.7 <sup>a</sup> ± 2.7 | 4.6 <sup>b,c</sup> ± 2.3  | 15.9 <sup>a</sup> ± 3.3 | 4.1 <sup>a,b</sup> ± 2.9 | 16 <sup>a</sup> ± 5.5   | 4.2 <sup>a,b</sup> ± 1.5   | 21 <sup>a,b</sup> ± 2   |
| 9W   | 15.8 <sup>a,b</sup> ± 6.5  | 17.8 <sup>a</sup> ± 1.8 | 23.3 <sup>a,b</sup> ± 7.3 | 21.8 <sup>a</sup> ± 1.6 | 12.9 <sup>a,b</sup> ± 4.3 | 15.8 <sup>a</sup> ± 2.9 | 20.3 <sup>a</sup> ± 4.7  | 21.8 <sup>a</sup> ± 1.3 | 32.5 <sup>a,b</sup> ± 22.9 | 22.9 <sup>a</sup> ± 3.9 |
| 13W  | 27.1 <sup>a</sup> ± 10.9   | 16.6 <sup>a</sup> ± 2.6 | 49.2 <sup>a</sup> ± 13.1  | 22 <sup>a</sup> ± 2.8   | 32.5 <sup>a</sup> ± 13.4  | 16 <sup>a</sup> ± 3.1   | 39.9 <sup>a</sup> ± 24.9 | 19 <sup>a</sup> ± 4.7   | 51.0 <sup>a</sup> ± 22.4   | 21.2 <sup>a</sup> ± 3.6 |

Different superscript letters (a, b, c, d) indicate significant differences of at least  $P < 0.05$  between time points, for weight or length, within each cultivar.
