# Supplementary material for: Carrot AOX2a Transcript Profile Responds to Growth and Chilling Exposure
Source: MDPI journal article supplement (doi:10.3390/plants10112369), 2021-11-03
Supplement: s1 [file s1]

**Table S4.** Primers used in RT-qPCR. AS corresponds to amplicon size and E corresponds to primer efficiency.

| Gene           | Primer sequence (5'→3')      | AS (bp) | E (%) |
|----------------|------------------------------|---------|-------|
| <i>EF-1A</i>   | Fw: TGGTGATGCTGGTTTCGTTAAG   | 75      | 99    |
|                | Rv: AGTGGAGGGTAGGACATGAAGGT  |         |       |
| <i>GAPDH</i>   | Fw: GGGAGGTGCAAAGAAAGTTATCA  | 79      | 96    |
|                | Rv: TTCCTTTTCATTGACACCAACAA  |         |       |
| <i>5.8S</i>    | Fw: AATGACTCTCGGCAACGGATAT   | 73      | 102   |
|                | Rv: TCACACCAAGTATCGCATTTTCG  |         |       |
| <i>DcAOX1</i>  | Fw: CTTCAACGCCTACTTCCTTG     | 196     | 97    |
|                | Rv: ATCTCGCAATGTAGAGTCAGC    |         |       |
| <i>DcAOX2a</i> | Fw: TCTTCAATGCTTTCTTTGTTCTT  | 200     | 93    |
|                | Rv: GACATCTTTTAGTTTGGCATCTTT |         |       |

AS: amplicon size; E: primer efficiency.
