# Supplementary material for: Carrot AOX2a Transcript Profile Responds to Growth and Chilling Exposure
Source: MDPI journal article supplement (doi:10.3390/plants10112369), 2021-11-03
Supplement: s1 [file s1]

**Table S2** Category wise list of *cis*-elements extracted from 2 Kbp upstream region of *DcAOX1* using PlantCare and PLACE.

| Categories based on functions | Extracted <i>Cis</i> -element (Tools used) |            | Sequence   | Specific functions of <i>cis</i> -elements                                                                                                                                         |
|-------------------------------|--------------------------------------------|------------|------------|------------------------------------------------------------------------------------------------------------------------------------------------------------------------------------|
|                               | NewPlace                                   | PlantCARE  |            |                                                                                                                                                                                    |
| <b>Cellular Functions</b>     | BOXIINTPATPB                               | -          | ATAGAA     | Organelle specific (plastid) gene expression                                                                                                                                       |
|                               | CAATBOX1                                   | -          | CAAT       | Tissue specific gene expression                                                                                                                                                    |
|                               | CACTFTPPCA1                                | -          | TACT/CACT  | Mesophyll-specific gene expression                                                                                                                                                 |
|                               | CEREGLUBOX2PSLEGA                          | -          | TGAAAACCT  | Tissue specific legumin gene                                                                                                                                                       |
|                               | CCAATBOX1                                  | -          | CCAAT      | Flowering regulation                                                                                                                                                               |
|                               | CCA1ATLHCB1                                | -          | AAAAATCT   | Phytochrome regulation                                                                                                                                                             |
|                               | CIACADIANLELHC                             | circadian  | CAANNNNATC | Circadian control                                                                                                                                                                  |
|                               | DOFCOREZM                                  | -          | AAAG       | Sperm-specific expression during gametophyte development                                                                                                                           |
|                               | E2FAT                                      | -          | TTTCCCGCC  | Cell cycle-regulated expression                                                                                                                                                    |
|                               | E2FANTRNR                                  | -          | TTTCCCGC   | Cell cycle progression (G1/S transition)                                                                                                                                           |
|                               | E2F1OSPCNA                                 | -          | GCGGGAAA   | Transcriptional activation in dividing cells and tissues                                                                                                                           |
|                               | -                                          | GCN4_motif | TGAGTCA    | Endosperm specific gene expression                                                                                                                                                 |
|                               | -                                          | HD-Zip 2   | CAATCATTG  | Control of leaf morphology development                                                                                                                                             |
|                               | POLLEN1LELAT52                             | -          | AGAAA      | Anther and pollen development                                                                                                                                                      |
|                               | UP2ATMSD                                   | -          | AAACCCTA   | Initiation of axillary bud outgrowth                                                                                                                                               |
|                               | WUSATAg                                    | -          | TTAATGG    | Regulation of stem cell population maintenance in shoots and floral meristems; regulation of genes expressed in the central cells of quiescent centers in the root apical meristem |
| <b>Stress Response</b>        | XYLAT                                      | -          | ACAAAGAA   | Secondary xylem development                                                                                                                                                        |
|                               | ABRERATCAL                                 | -          | CACGCGT    | Calcium responsiveness                                                                                                                                                             |
|                               | ANAERO1CONSENSUS                           | -          | AAACAAA    | Anaerobically induced                                                                                                                                                              |
|                               | BIHD1OS                                    | -          | TGTCA      | Disease resistance responses                                                                                                                                                       |
|                               | BOXCPSAS1                                  | -          | CTCCAC     | Light responsiveness                                                                                                                                                               |
|                               | -                                          | Box 1      | TTTCAAA    | Light responsiveness                                                                                                                                                               |
|                               |                                            |            | TGATAATGT  |                                                                                                                                                                                    |
|                               |                                            |            | AAGATAAGA  |                                                                                                                                                                                    |
|                               | -                                          | Box 4      | ATTAAT     | Light responsive                                                                                                                                                                   |
|                               | -                                          | CATT-motif | GCATTC     | Light responsive                                                                                                                                                                   |
|                               | CBFHV                                      | -          | ATCGAC     | Cold responsive (freezing tolerance )                                                                                                                                              |
|                               | CCAATBOX1                                  | -          | CCAAT      | Heat shot enhanced expression (HSE)                                                                                                                                                |
|                               | CGCGBOXAT                                  | -          | ACGCGT     | Calmodulin-binding/CGCG box                                                                                                                                                        |
|                               | CURECORECR                                 |            | GTAC       | Copper- and oxygen-responsive                                                                                                                                                      |

|                            |                                         |                                                |                                                                                                                                    |                                                                                                                                                            |
|----------------------------|-----------------------------------------|------------------------------------------------|------------------------------------------------------------------------------------------------------------------------------------|------------------------------------------------------------------------------------------------------------------------------------------------------------|
|                            | EBOXBNNAPA<br>EECCRCAH1                 | -                                              | CANNTG<br>GATTTTC<br>GAATTTC<br>GAATTGC<br>GAGTTGC<br>TTGACC<br>GATA<br>GGTTAA<br>CTTTATCA<br>TAACTG<br>CGGTCA<br>CAACTG<br>CANNTG | Regulates defense-related gene<br>CO2-responsive transcriptional activation                                                                                |
|                            | ELRECOREPCRPI<br>GATABOX<br>-<br>-<br>- | Box-W1<br><br>GT1-motif<br>LAMP-element<br>MBS |                                                                                                                                    | Pathogen- and wound-induced signaling<br>Light regulated, and tissue specific expression<br>Light responsive<br>Light responsive<br>Drought responsiveness |
|                            | MYCCONSUSAT                             | -                                              |                                                                                                                                    | Cold responsive (freezing tolerance)                                                                                                                       |
|                            | SORLIP1AT<br>-                          | -<br>Sp1<br>TCT-motif<br>TCCC-motif            | GCCAC<br>CCGCCC<br>TCTTAC<br>TCTCCCT<br>TATTCT                                                                                     | Light responsive on root -specific genes<br>Light responsive<br>Light responsive<br>Light responsive<br>Light responsive                                   |
|                            | -10PEHVPSBD                             | -                                              |                                                                                                                                    |                                                                                                                                                            |
| <b>Hormonal Regulation</b> | ABRERATCAL                              | -                                              | MACGYGB                                                                                                                            | ABRE-related sequence as Ca <sup>2+</sup> -responsive                                                                                                      |
|                            | ARFAT                                   | -                                              | TGTCTC                                                                                                                             | Auxin-responsive                                                                                                                                           |
|                            | ARR1AT                                  | -                                              | TGATT                                                                                                                              | Cytokinin-regulated                                                                                                                                        |
|                            | ATHB6COREAT                             | -                                              | CAATTATTA                                                                                                                          | Absciscic acid (ABA) regulated                                                                                                                             |
|                            | CAREOSREP1                              | -                                              | CAACTC                                                                                                                             | Gibberellin (GA)-responsive                                                                                                                                |
|                            | -                                       | CGTCA-motif                                    | CGTCA                                                                                                                              | Methyl jasmonate (MeJa) responsive                                                                                                                         |
|                            | CPBCSPOR                                |                                                | TATTAG                                                                                                                             | Cytokinin-responsive                                                                                                                                       |
|                            | DPBFCOREDCDC3                           | -                                              | ACACATG                                                                                                                            | ABA-responsive and embryo-specification elements                                                                                                           |
|                            | ERELEE4                                 | ERE                                            | ATTTCAAA<br>AATTCAAA                                                                                                               | Ethylene responsive                                                                                                                                        |
|                            | GARE1OSREP1                             | -                                              | TAACAGA                                                                                                                            | GA-responsive                                                                                                                                              |
|                            | -                                       | TCA-element                                    | CCATCTTTT<br>CAGAAAAGGA                                                                                                            | Salicylic acid responsive                                                                                                                                  |
