# Supplementary material for: Carrot AOX2a Transcript Profile Responds to Growth and Chilling Exposure
Source: Plants (Basel). 2021 Nov 3;10(11):2369. doi: 10.3390/plants10112369 (PMC8625938; doi:10.3390/plants10112369)
Supplement: Supplementary file 1 [file plants-10-02369-s001.zip]

Archive with 5 entries (5 files):
- Figure S1.tif
- Table S1.pdf
- Table S2.pdf
- Table S3.pdf
- Table S4.pdf
